# Supplementary material
Source: PubMed Central journal article supplement (PMC5730888)
Supplement: EMBJ-36-3573-s002.pdf [file EMBJ-36-3573-s002.pdf]

## Expanded View Figures

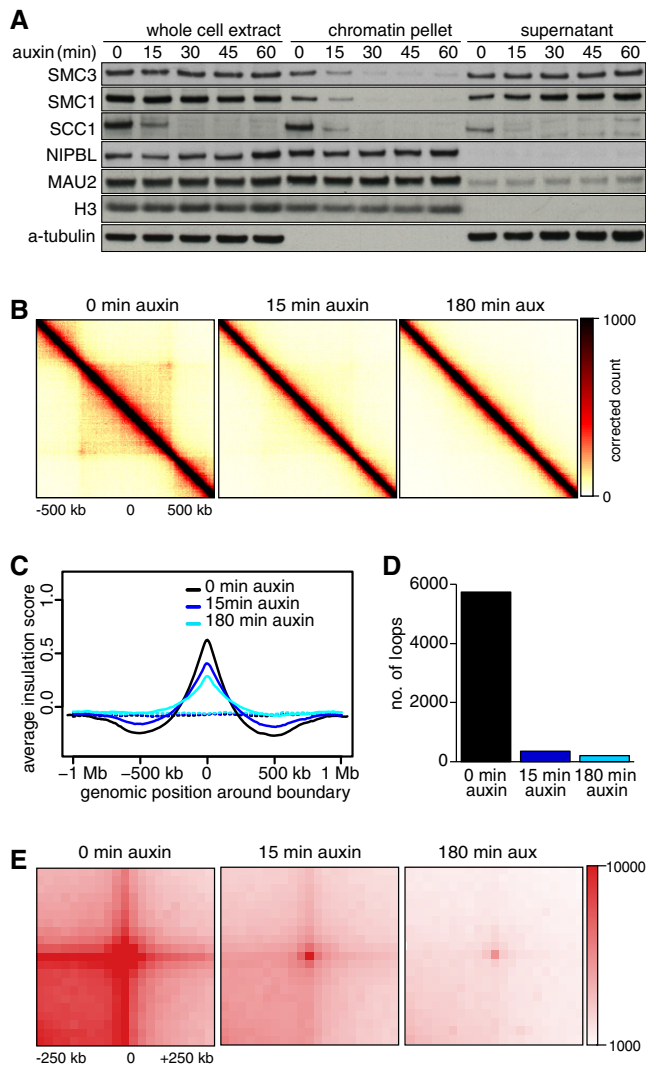

**Figure EV1. Chromatin organization changes upon auxin-induced *Sccl* degradation for 15 and 180 min.**

- A Same chromatin fractionation experiment as shown in Fig 1E. Note that the amount of cohesin loading complex, NIPBL, and MAU2, on chromatin were largely unchanged after SCC1 degradation.
- B Aggregate TAD analysis for SCC1-mEGFP-AID cells expressing Tir1, at 0 (left), 15 (center), and 180 min (right) after auxin addition. Average coverage-corrected Hi-C contact matrices are shown centered around the 166 × 500–550 kb long TADs identified in the control-depleted G1 cells.
- C Average insulation score around TAD boundaries identified for the control-depleted G1 cells, at 0 (black), 15 (blue), and 180 min (cyan) after auxin addition. Dashed lines show the average insulation score around the +1 Mb shifted boundaries as control.
- D Number of loops identified by HiCCUPS, at 0, 15, and 180 min after auxin addition. Colors are the same as in (C).
- E Total contact counts around loops after auxin addition, for all 750 kb–6 Mb long loops identified by HiCCUPS in G1 control.

Source data are available online for this figure.

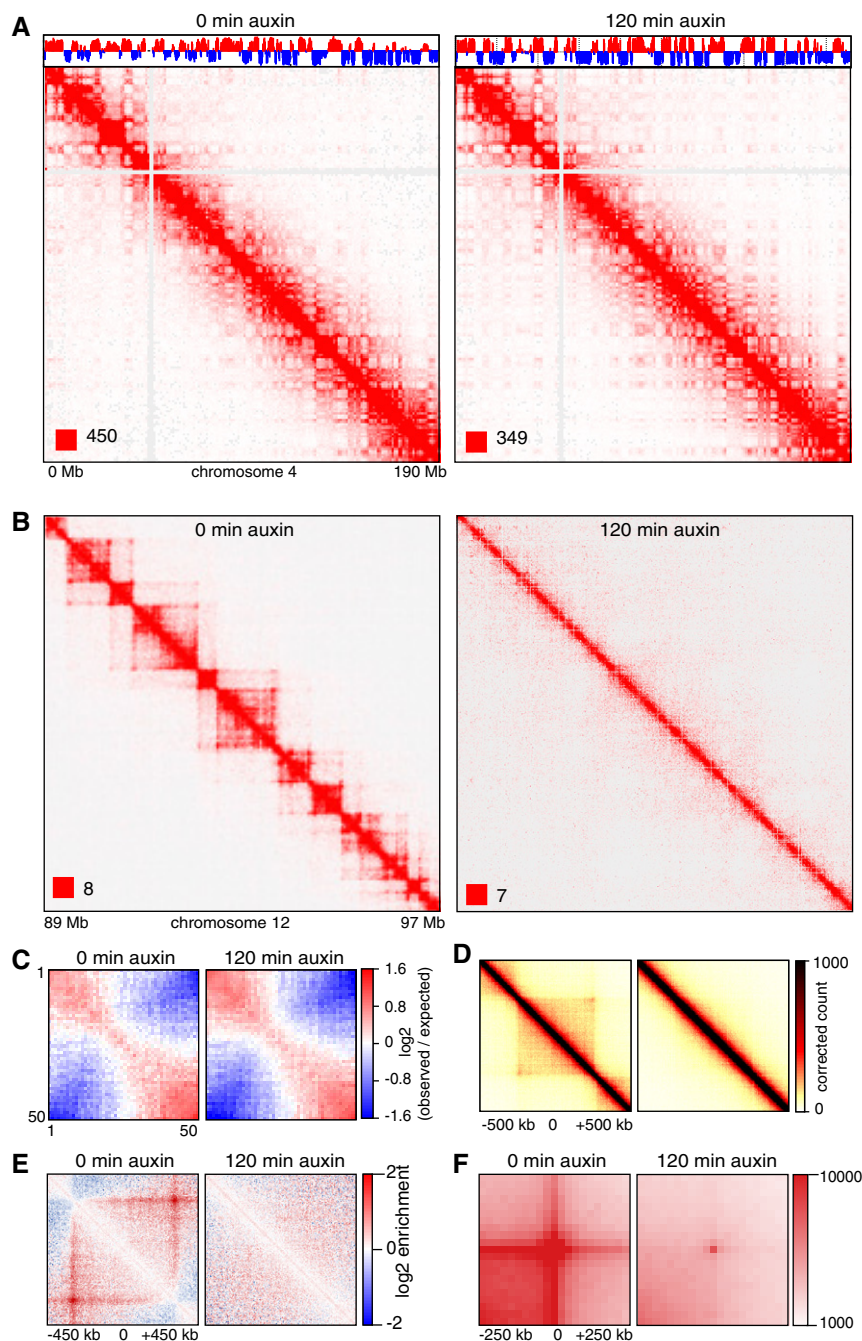

**Figure EV2. Chromatin organization changes upon auxin-induced Scc1 degradation for 15 and 120 min.**

- A Coverage-corrected Hi-C contact matrices of chromosome 4, at 0 and 120 min after auxin addition in SCC1-mEGFP-AID cells. The corresponding compartment signal tracks at 250 kb bin resolution are shown above the matrices. The matrices were plotted using Juicebox.
- B For the same conditions, coverage-corrected Hi-C contact matrices in the 89–97-Mb region of chromosome 12, plotted by using Juicebox.
- C Inter-chromosomal contact enrichment between 250 kb bins with varying compartment strength from most B-like (1) to most A-like (50), in SCC1-mEGFP-AID control cells in a replicate experiment, at 0 and 120 min after auxin addition.
- D Aggregate TAD analysis for CTCF-mEGFP-AID cells expressing Tir1, 0 (left) and 120 min (right) after auxin addition. Average coverage-corrected Hi-C contact matrices are shown centered around the 166 × 500–550 kb long TADs identified in the control-depleted HeLa cells.
- E Average contact enrichment around loops after auxin addition in SCC1-mEGFP-AID cells, for the 82 × 600 kb long loops identified by HiCCUPS in G1 control. The matrices are centered (0) around the halfway point of the loop anchor coordinates.
- F Total contact counts around loops after auxin addition in SCC1-mEGFP-AID cells, for all 750 kb–6 Mb long loops identified by HiCCUPS in G1 control.

**Figure EV3. Depletion of Wapl and PDS5 proteins does not change localization and levels of condensin.**

- A Live-cell imaging of SCC1-mEGFP, CAP-D2-mEGFP, and CAP-D3-mEGFP cells in which all alleles of these genes were C-terminally fused to a mEGFP tag by CRISPR/Cas9 engineered genome editing. Representative cells at interphase, prophase, and prometaphase are shown. DNA was stained with SiR-DNA by Spirochrome. Scale bar indicates 5 μm.
- B Live-cell imaging of SCC1-mEGFP, CAP-D2-mEGFP, and CAP-D3-mEGFP cells depleted for control or WAB by RNAi. DNA was stained with SiR-DNA by Spirochrome. Scale bar indicates 10 μm.
- C Immunofluorescence images of CAP-D3-mEGFP cells depleted for SMC2, WAB, or SMC2/WAB. GFP staining was used as readout for estimating condensin depletion efficiency. Scale bar indicates 5 μm.
- D Quantification of immunofluorescence intensities for GFP signal in cells depleted for control and SMC2 is shown. Error bar depicts standard deviations of the means. Data from 2 replicates.

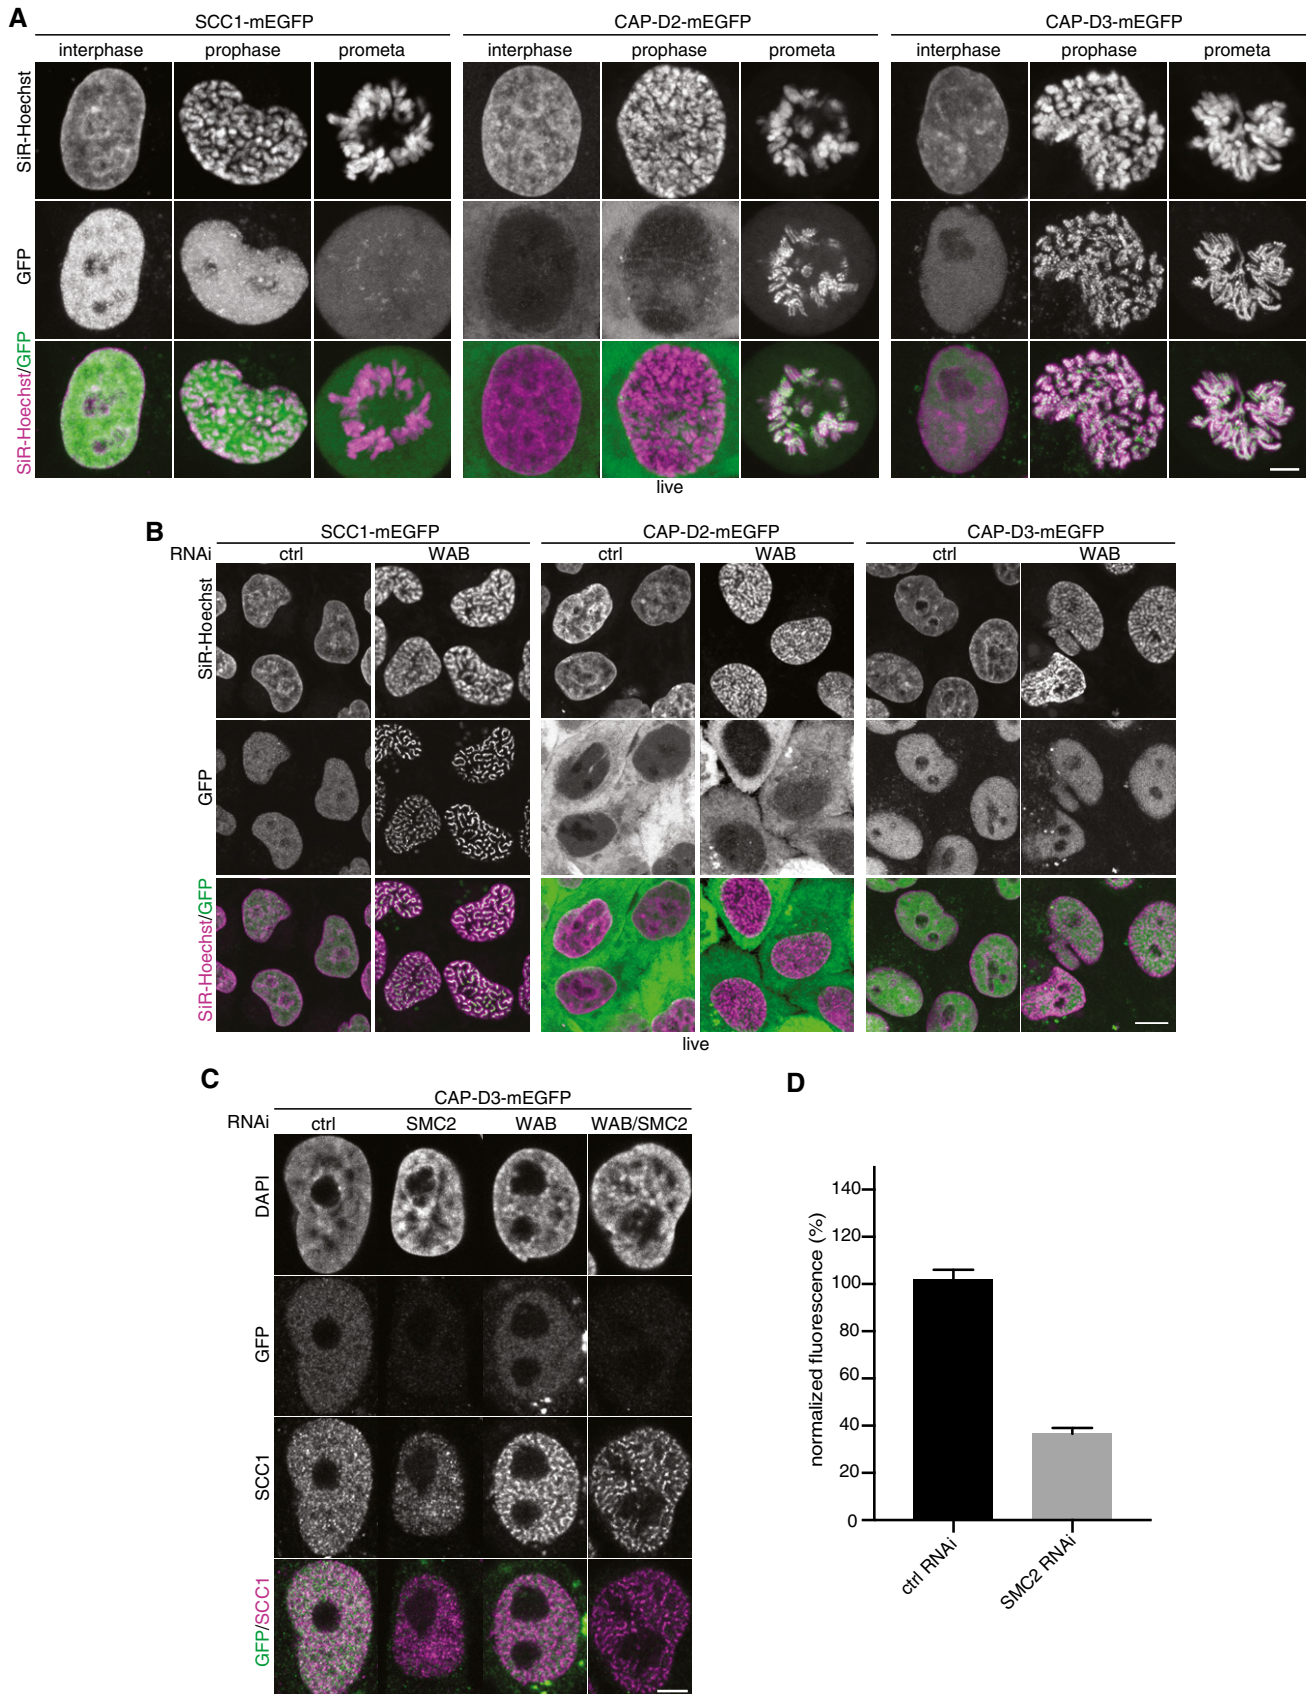

Figure EV3.

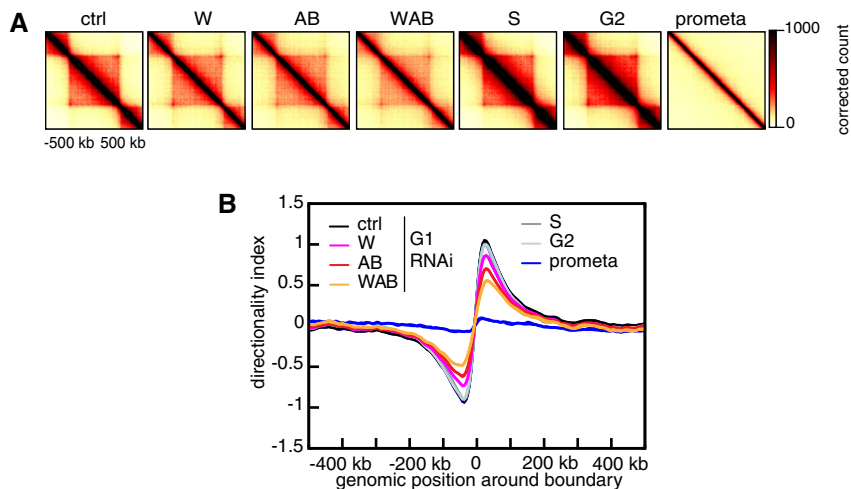

**Figure EV4. Insulation decreases upon depletion of WAPL and PDS5 proteins.**

A Aggregate TAD analysis for control-depleted (ctrl), WAPL-depleted (W), PDS5A/PDS5B-depleted (AB), joint WAPL/PDS5A/PDS5B-depleted (WAB) cells in G1-phase, as well as S-phase (S), G2-phase (G2), and prometaphase (prometa) cells. Average coverage-corrected Hi-C contact matrices are shown centered around the 166 × 500–550 kb long TADs identified in the control-depleted G1 cells.

B Average standardized directionality index profiles in a 1 Mb region centered around TAD boundaries identified in the control-depleted cells, for the same conditions as in (A). Colors are as in Fig 7B.

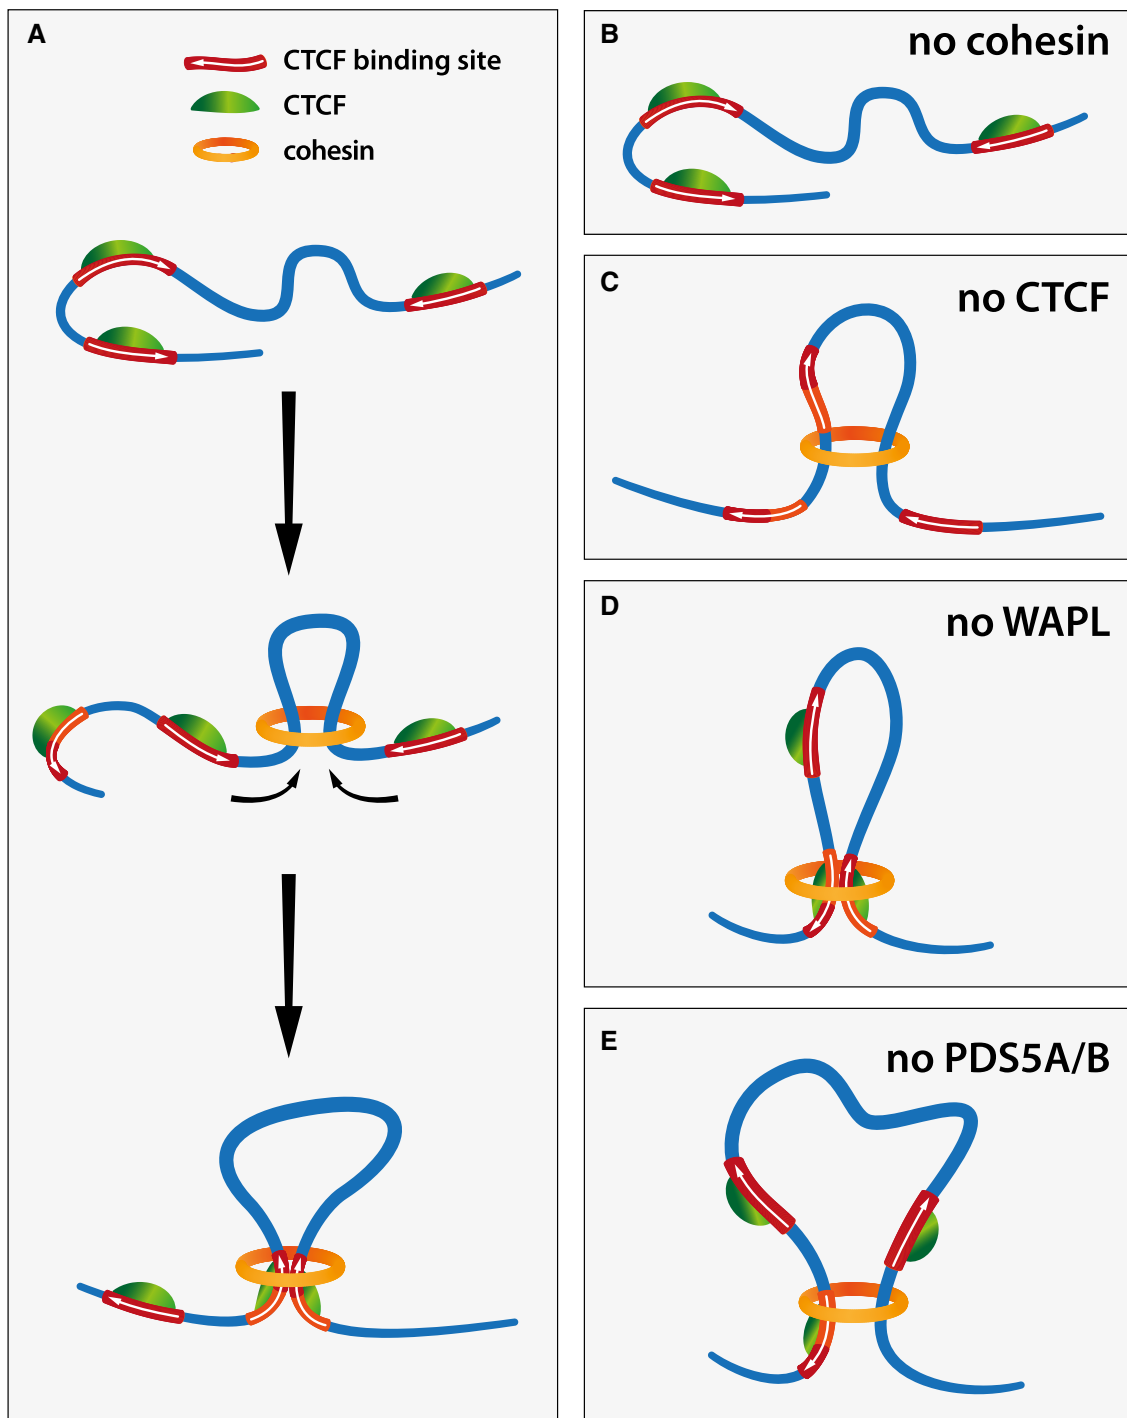

**Figure EV5. Loop formation depends on cohesin and is regulated by CTCF, WAPL, and PDS5 proteins.**

- A Graphical illustration of how cohesin might mediate loop extrusion. Cohesin binds to chromatin, extrudes a chromatin loop and stalls upon encountering CTCF bound at convergently oriented CTCF sites.
- B In the absence of cohesin, chromatin loops are eliminated.
- C In the absence of CTCF, cohesin extrudes chromatin loops but fails to stall at convergently oriented CTCF binding sites.
- D, E In the absence of WAPL (D) or PDS5A/B (E), cohesin extrudes longer chromatin loops, which occur more frequently between regions of non-convergent (D) or single CTCF sites (E). While in the absence of Wapl loop extrusion still halts at occupied CTCF sites, in the absence of PDS5A/B loop extrusion may halt less readily, resulting in fewer specific loops called.
