# Supplementary material
Source: PubMed Central journal article supplement (PMC5730888)

B

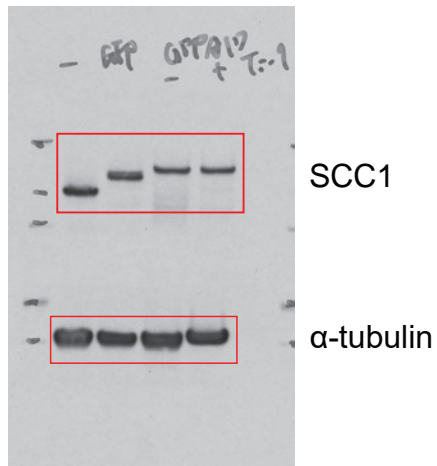

E

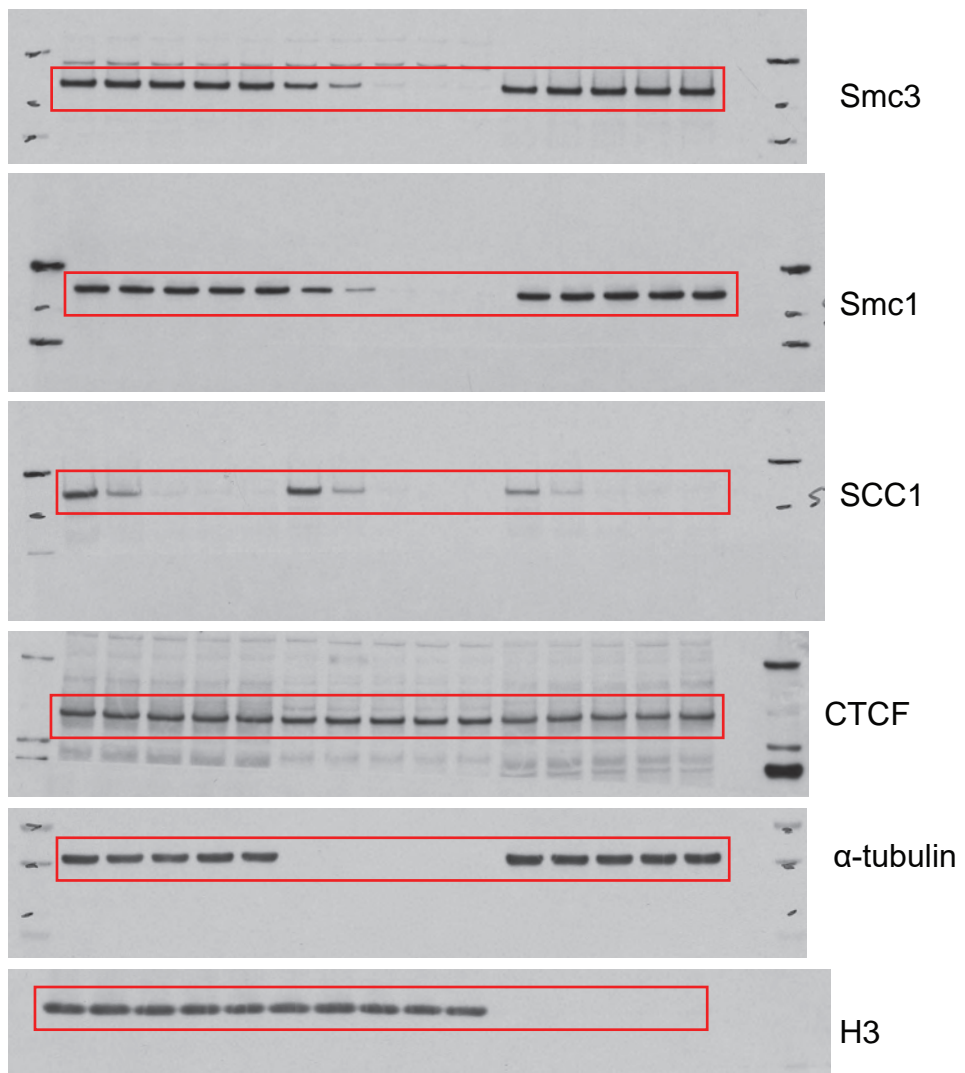

Supplement: EMBJ-36-3573-s004.pdf [file EMBJ-36-3573-s004.pdf]

B

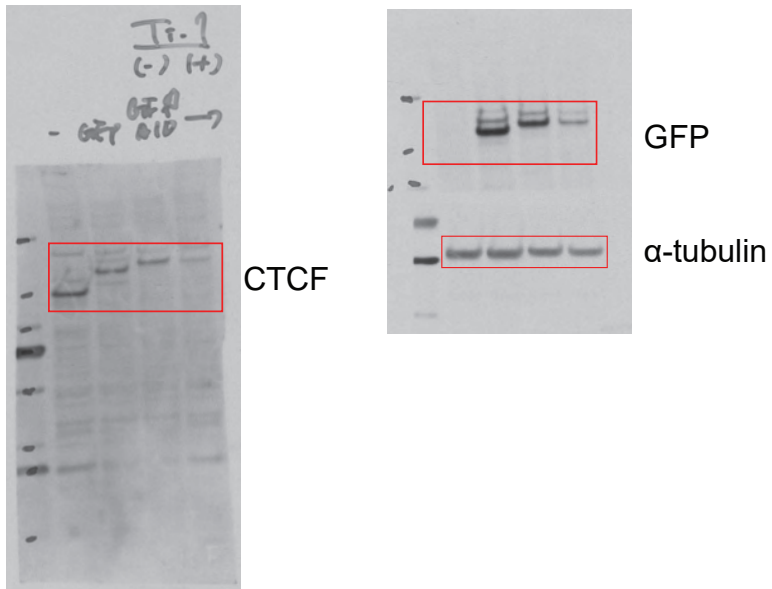

E

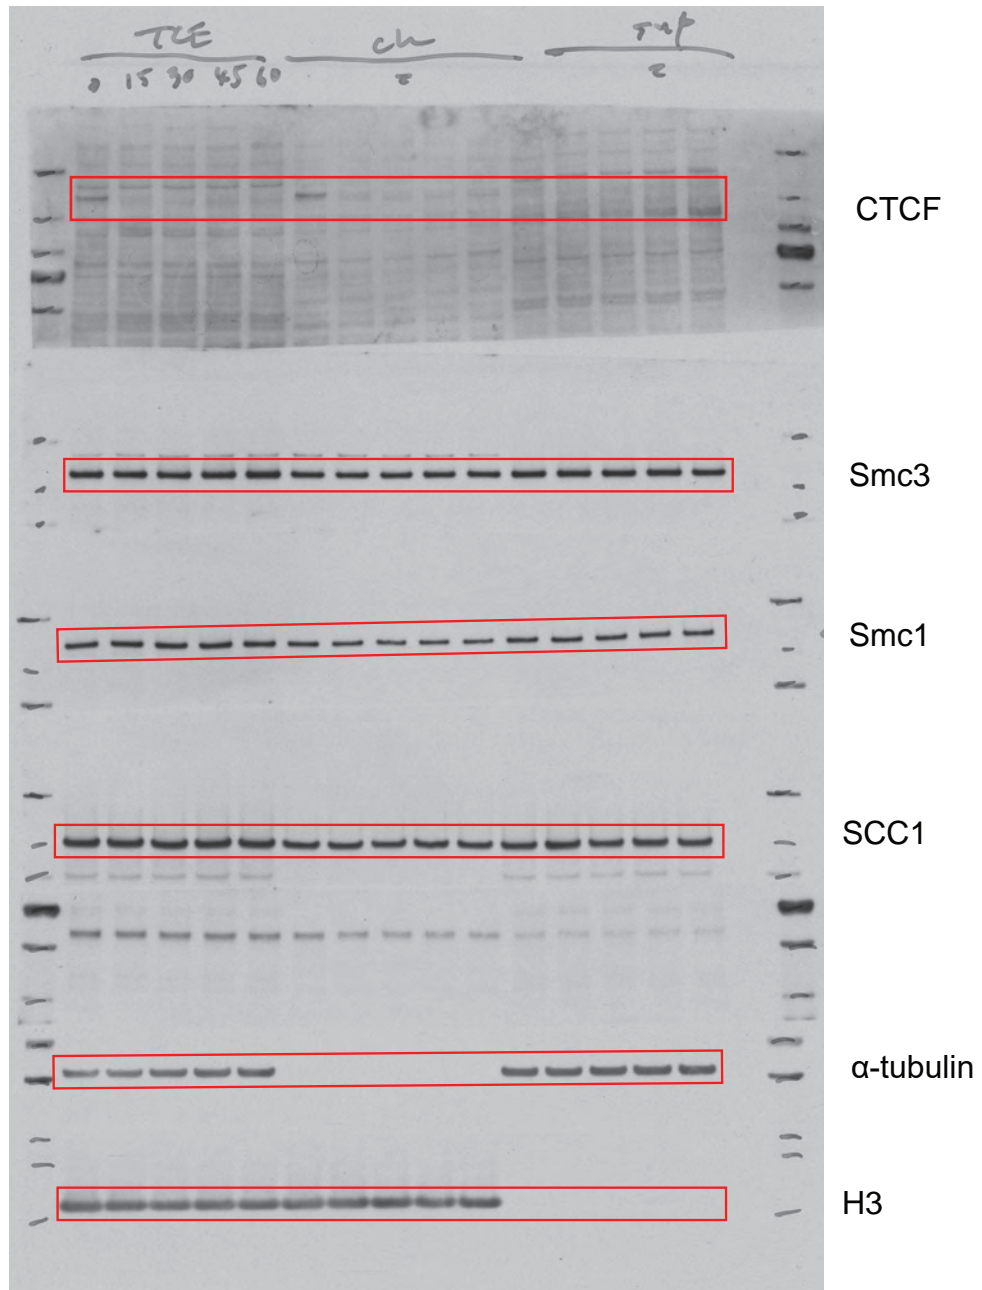

Supplement: EMBJ-36-3573-s005.pdf [file EMBJ-36-3573-s005.pdf]

A

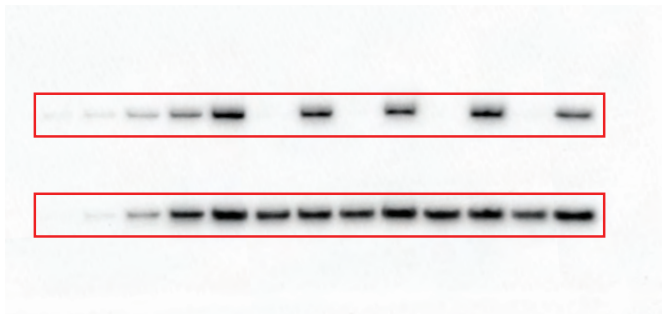

PDS5A

$\alpha$ -tubulin

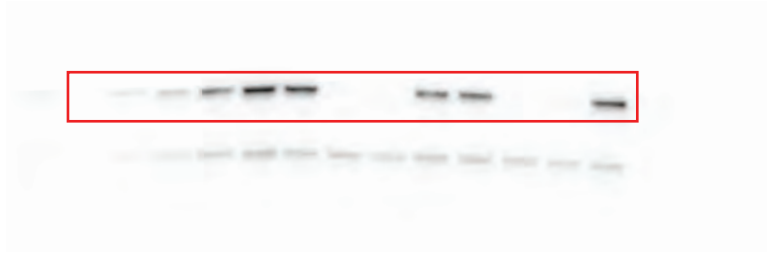

PDS5B

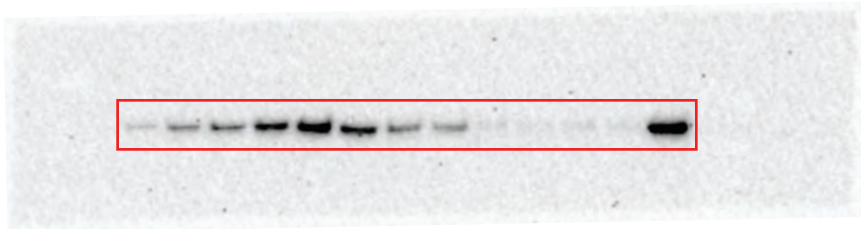

Wapl

Supplement: EMBJ-36-3573-s006.pdf [file EMBJ-36-3573-s006.pdf]

G

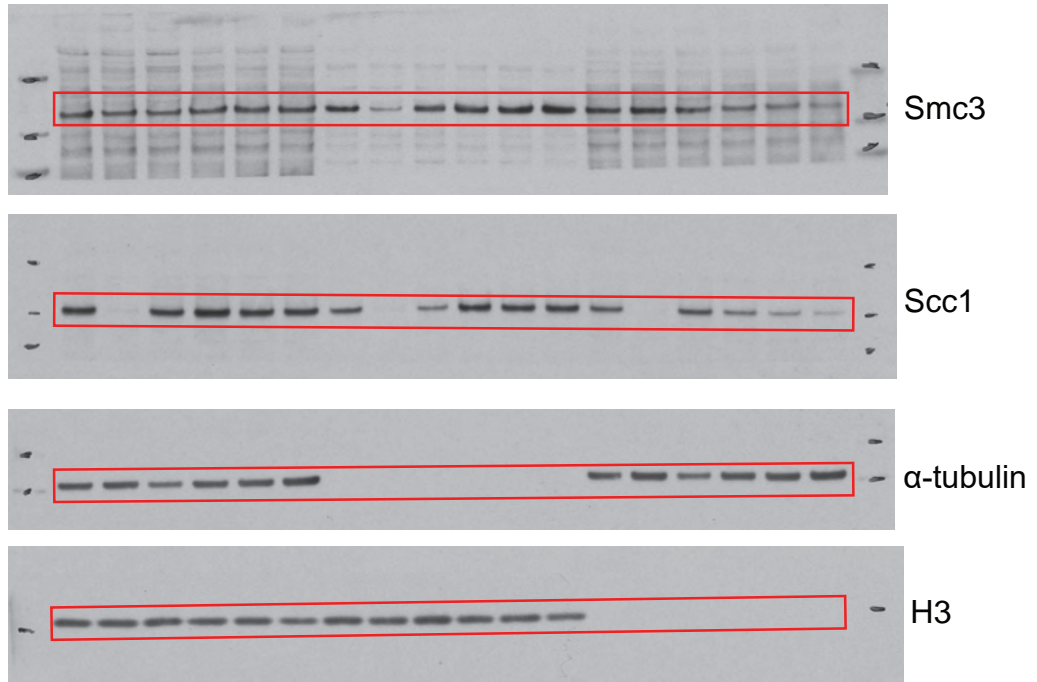

Supplement: EMBJ-36-3573-s007.pdf [file EMBJ-36-3573-s007.pdf]
